# Supplementary material
Source: publisher figshare collection journal article supplement (https://rs.figshare.com/ndownloader/files/18107360)
Supplement: Supplementary file 1 [file 18107360]

## Sheet: Sheet1
momtoo	mat_age	iugr	Baby Weight
460400	17	0	1405
258328	19	0	515
507040	19	0	810
511778	26	0	545
549118	26	0	1750
551032	36	0	795
572979	19	0	790
575571	14	0	1720
290278	39	0	895
492466	20	0	615
563238	40	1	1100
495390	17	0	1960
545500		0	625
347909	36	1	850
334305	20	0	1830
475139	30	0	720
485534	26	0	670
550911	21	0	1205
280027	32	0	1510
503608	22	0	1525
275711	33	0	600
533696	34	1	1100
402812	26	0	1450
559931	34	0	1505
285280	34	0	830
471407	38	0	1215
532800	33	1	630
449938		0	1385
488016	29	0	815
383049	34	0	1190
455241	39	0	1175
469059	20	0	1175
168561	36	0	1275
455439	21	0	805
544277	22	0	590
475501	23	0	775
482074		0	955
497705	22	0	1120
422965	29	0	1540
429850	27	0	1730
504811	22	0	860
443823	38	0	1245
431150	31	0	1195
484928	16	0	790
523223	25	0	1220
431876		0	920
519718	30	0	740
519105	17	0	665
500801	33	0	1360
93209	37	0	410
523162	31	0	1335
569987	23	0	1045
487805	23	0	1230
438246	25	0	710
548511		1	440
424620	36	0	1510
529599	19	0	2775
238573	30	0	1069
519100	32	0	1115
507533	24	0	1030
402823		0	1390
495493	28	0	915
230072	18	1	1460
455684	25	0	1255
99235	39	0	1135
465774	21	0	1845
449350	20	0	920
327539	33	0	900
497785	34	0	695
560453	23	0	1380
151301	25	0	1190
50475	27	0	980
376966		0	1570
510419	31	0	1255
432680	23	1	855
529789	31	0	1395
515363	37	0	1950
512374	31	0	1235
398058	18	0	1500
511146	35	0	1130
443137	28	1	1030
461205	25	0	665
430216	31	0	960
491885	38	0	1280
9778		0	1100
488875	29	0	605
348289	27	0	1680
277899	41	0	1425
469905	37	0	1375
500606	38	0	1150
574013	27	1	1060
547310	36	0	600
569337	35	0	1140
510828	32	0	1890
389336		0	980
479386	19	0	1940
556427	28	1	1055
281703	26	0	1105
423907	33	0	570
412940	23	0	735
451970	25	0	1590
557250	29	1	1000
535811	32	0	1575
247666		0	1405
		0	1345
567723	32	0	1485
441396	32	0	1495
530233	20	0	600
576024	28	0	915
505905	22	0	955
475200	20	0	1390
479354	22	0	800
526635		0	1300
515080	22	0	2275
527506	28	0	1500
38502	22	0	1415
548748	23	0	945
513350	17	0	1465
520887		0	775
478901	22	0	950
460818	20	0	820
564914	22	0	1000
515232	30	0	695
	32	0	765
530364	23	0	1810
560226	33	1	1175
494877	30	0	985
505200	27	0	1495
210293	23	1	1285
522702	31	0	1495
479056	30	0	605
471948	34	0	575
569301	17	0	585
464204	32	1	1135
535412	24	0	920
355578	23	0	615
389360	23	0	1880
540627	18	0	1655
453841		0	910
504812	21	1	885
449406	28	0	1180
440736	18	0	700
577113	27	1	1970
485060	36	0	560
459311	29	0	1285
550909	20	0	1055
423465	27	0	1360
449049	23	0	1075
448440	28	0	1030
441814	34	0	570
60424	20	0	1200
600854	30	0	1475
501811	23	0	1660
520983	29	0	775
493500	18	1	980
449259	32	0	1195
534734	21	1	1395
548116	1	0	1815
431093	30	0	1770
465029	35	1	1390
476917	39	0	1060
449163	33	0	720
541417	24	0	1420
534228	34	0	1220
488547	35	0	625
459644	35	0	590
437600	32	0	775
522475	28	0	1655
540478	13	0	1390
429042		0	900
532598	18	0	1485
485509	36	0	815
477008	38	0	1090
507403	28	0	1305
473809	23	0	1510
538611	24	0	800
470600	21	0	1200
	20	0	1375
359686	24	0	1430
	24	0	1520
228105	26	0	685
388853	32	0	1585
274673	26	0	1620
510557	32	0	1750
454413	29	0	1195
460341	26	0	1640
527305	17	0	1540
477944	35	0	865
475811		0	1710
480838	41	0	1490
436776	28	0	1280
471633	28	0	1390
555226	21	0	1410
511182	30	1	815
268479	34	1	585
54361	23	0	625
431108	25	0	585
501933	24	0	1965
382098	33	0	1080
525516	36	0	1550
433907	35	0	1190
554189	33	0	645
434667	37	0	1400
453697	29	0	815
441256	25	0	1405
407755	35	0	940
	34	0	915
542025	31	1	900
539271	27	0	965
531646	38	0	640
460048	29	0	1440
514714	31	0	1675
569425	27	0	1700
448718	31	0	900
480304	30	0	540
80746	40	0	650
485360	15	0	955
450020		0	1380
570104	18	0	740
384955	33	0	840
510771	30	0	1705
518437	30	0	1730
431956	21	0	1395
551916	21	0	1930
456770	19	1	800
	20	1	530
465108	33	0	1550
560181	35	0	820
456152	25	0	870
114620		0	1335
459305	19	0	985
160532	35	0	1020
479186	21	0	590
606338	21	1	890
479634	32	0	1250
535000	22	0	655
524906	23	0	1435
447020	18	0	900
438214	17	0	1770
486371	25	0	1090
449257	32	0	1205
501993	32	0	1355
479970	19	0	1240
540449	28	0	1695
332444	37	0	680
260081	38	0	1470
467989	22	0	1870
300982		0	1175
312344	33	0	1325
543757	24	1	1230
479731	28	0	1130
519315	31	0	575
530122	30	0	1315
506769	28	0	1415
298696	36	0	1900
465820	23	0	660
114696	20	0	880
121484	33	0	1710
567063	33	0	555
534474	34	0	795
437451	22	0	975
460926	34	0	1075
511916	31	0	815
453307	2	0	980
450401	25	0	835
71014	33	0	1545
543922	23	0	1420
539008	26	0	1340
422291	32	0	1540
448321		0	1125
310203	25	0	1145
534244	26	0	1270
475539		0	945
136792		0	550
485707	38	0	1465
510813	29	0	1375
436340	32	0	1180
570279		0	630
32400	25	0	1080
449053		0	1780
422957	30	0	1035
208205	33	0	495
448792	27	0	1825
432305	29	0	1110
430746	24	0	1170
447046	30	0	1050
518803		0	340
434981		0	1215
474616	23	0	765
422688	17	0	1315
410987	33	0	1590
488036	21	0	1385
548751	25	0	1545
455242		0	650
385449	37	0	1800
492606	32	0	1425
529817	35	0	995
491720	19	0	1460
501236	24	0	1375
403146	34	1	335
475062	28	0	535
455669	29	0	635
442139	26	0	1380
336594	33	0	1208
511350	20	0	1395
485351	35	0	1485
272536	25	0	1485
	22	0	1680
151339		0	1115
464718	24	0	1850
484844	34	0	1370
442825	27	0	1200
534996	31	0	1485
575625		0	1125
460806	36	0	845
560548	33	0	1460
480835	28	0	740
559701	24	0	945
459789	36	0	1250
450521	24	0	1095
535563	25	0	1270
442179		0	1235
	26	0	700
531692	22	0	1850
429036	19	0	710
572133	34	1	490
428437	34	0	1900
551726	22	0	635
468822	28	0	710
495115	35	0	755
470422	37	0	1410
569958	19	0	675
532003	24	0	990
548701	30	0	1070
498120	25	0	1650
534847	40	0	515
230826	40	0	2005
498999	29	0	1100
555334	25	0	1885
171193	32	0	1106
434907		0	1175
437208	29	0	680
490005	23	0	1735
567669		0	1495
510003	17	0	1480
604867	21	0	1255
455821	21	0	845
530462	24	0	1195
441238	17	0	790
473046	20	0	1315
557057	29	1	500
505405	30	0	560
	30	0	720
470444	26	0	975
498803	30	0	900
522277	31	0	620
455503	32	0	800
501388	25	0	1585
564847	18	0	1670
487990	35	0	845
452121	59	0	660
522457	36	0	1420
563321	36	0	945
407968	22	0	685
22625	37	0	1730
405132	29	0	1010
510799		0	1195
505943	30	0	1495
508440	33	0	970
465477	26	0	1035
470706	19	0	1005
420340	26	0	1065
503629	25	0	360
455454	18	0	935
501311	17	0	1215
470727	28	0	740
483529	19	0	1370
495428	27	0	1290
416818		0	590
540692	33	0	990
554601	25	0	1625
548766	35	0	1025
508502	35	0	1375
378454	30	0	1250
540682		0	1895
337701	25	0	1095
481296	44	0	1030
519061	28	1	540
438008	35	0	1040
568709	28	0	1530
426920	20	0	1625
459801	23	0	685
528814	26	0	715
479110	29	0	850
530448	32	0	2015
600205	29	0	925
238932		1	1025
419220	36	0	1665
491724	29	1	870
176565		0	830
540170	35	0	1365
479603	30	0	765
540547	39	0	1065
544231	25	0	1075
503628	33	0	675
491709	31	0	1495
561262	20	0	590
488413	28	0	1275
504801	20	0	1320
464238	34	0	1260
527213	26	0	1135
492459	23	0	825
502015	16	0	1665
485878	33	1	975
497057	23	0	1430
465344	25	1	830
570275	31	0	1140
455168		0	1125
321510	27	0	810
484509	20	0	820
488542		0	955
480845	27	0	1725
511294	22	0	835
470917	17	0	850
601630	19	0	725
543951		0	1470
563900	32	0	1755
481579	39	0	1800
505688	31	0	615
370684	27	0	675
558617	18	0	1655
530569	29	0	745
530788	34	0	1365
530314	22	0	1115
477559	28	1	845
	25	0	620
308018	33	0	795
539010		0	885
564911	24	0	980
559986	35	0	1810
363541	32	0	900
441622	19	1	1015
515240	22	0	1165
86834	18	0	1120
323922	25	0	1335
142209	20	0	985
346734	29	1	775
513438	33	0	965
560484	31	0	1140
602543	38	0	480
196919	33	0	1660
510860	18	0	790
343858	19	1	700
535540	33	0	815
111039		0	545
496313	36	0	1385
474626	26	0	1570
207089		0	1460
495175	30	0	1475
548777	31	0	780
402524		0	1620
